# Supplementary material
Source: PubMed Central journal article supplement (PMC8739503)
Supplement: mmc1.pdf [file mmc1.pdf]

Supplementary Materials  
Figures & Tables

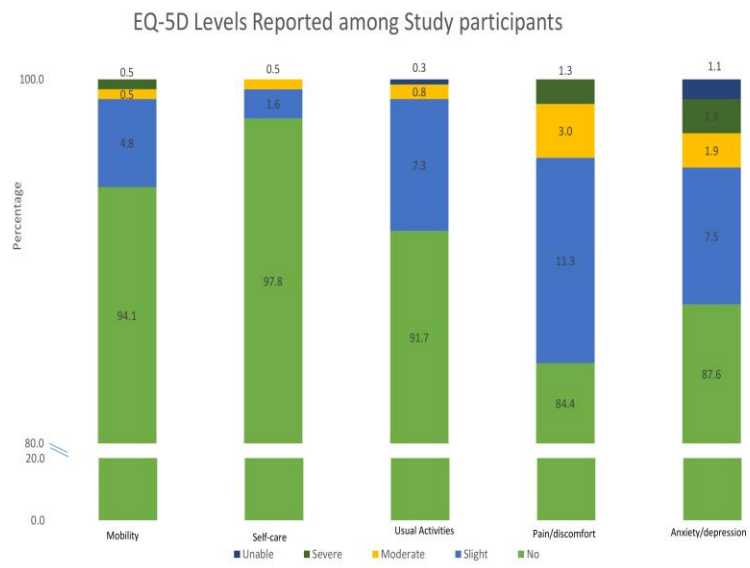

Supplementary Figure 1 EQ5D Levels reported among study participants

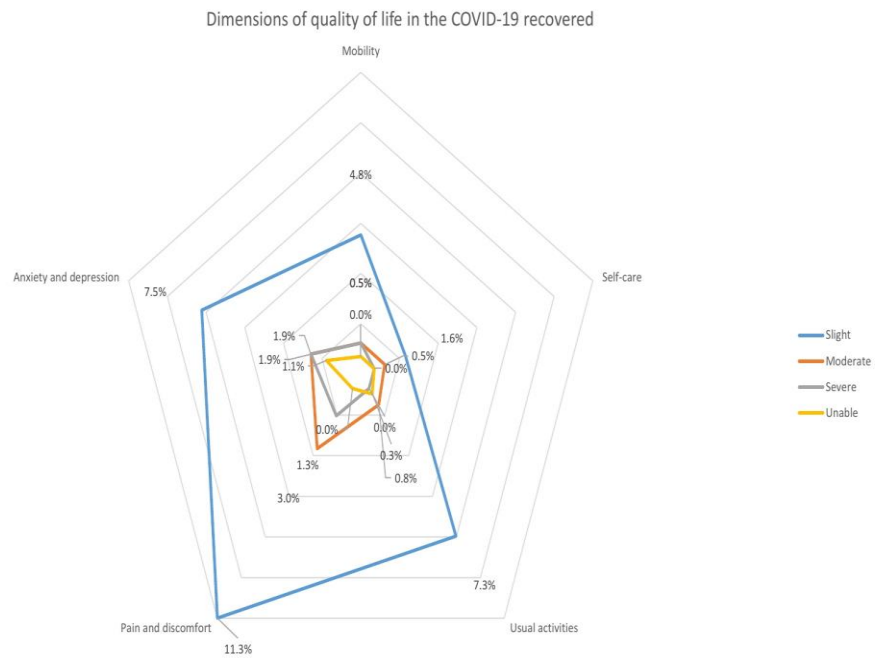

Supplementary Figure 2 Dimensions of EQ5D Levels. The figure presents the percentage of individuals with some problem (2 or more points in EQ5D questionnaire) in each dimension of quality of life

Supplementary Table 1: Level function score (LFS) of COVID -19 individuals

| Level function score (LFS) | n   | %   | Utility score |
|----------------------------|-----|-----|---------------|
| 5                          | 285 | 77  | 1.000(0.00)   |
| 6                          | 36  | 9.7 | 0.786(0.02)   |
| 7                          | 20  | 5.4 | 0.70(10.03)   |
| 8                          | 10  | 2.7 | 0.655(0.03)   |
| 9                          | 7   | 1.9 | 0.591(0.05)   |
| 10                         | 4   | 1.1 | 0.570(0.06)   |
| 11                         | 4   | 1.1 | 0.524(0.09)   |
| 12                         | 2   | 0.5 | 0.38(0.05)    |
| 14                         | 2   | 0.5 | 0.379(0.03)   |
| 15                         | 1   | 0.3 | 0.245(0.00)   |
| 18                         | 1   | 0.3 | 0.137(0.00)   |
| 5                          | 285 | 77  | 1.000(0.00)   |
| 6                          | 36  | 9.7 | 0.786(0.02)   |
| 7                          | 20  | 5.4 | 0.70(10.03)   |
| 8                          | 10  | 2.7 | 0.655(0.03)   |
| 9                          | 7   | 1.9 | 0.591(0.05)   |
| 10                         | 4   | 1.1 | 0.570(0.06)   |

Supplementary Table 2: Multivariate Regression Relationships between 5 dimensions of EQ-5D and Socio-demographic characteristics

| EQ-5D 5L Index           | Characteristics    | B     | SE    | P value | Odds ratio | 95% CI      |
|--------------------------|--------------------|-------|-------|---------|------------|-------------|
| <b>Mobility*</b>         | Occupation         | 0.174 | 0.080 | 0.029   | 1.1190     | 1.018-1.391 |
| <b>Usual Activities*</b> | Gender             | 0.779 | 0.394 | 0.048   | 2.179      | 1.007-4.714 |
|                          | Place of residence | 0.764 | 0.378 | 0.043   | 2.146      | 1.023-4.503 |

\*Reference category is no problem
